# Supplementary material
Source: PubMed Central journal article supplement (PMC6728082)
Supplement: NIHMS1535495-supplement-1.pdf [file NIHMS1535495-supplement-1.pdf]

## Supplemental Figure Legends

### **Fig S1. Nel kills Ngo clinical isolates D006 and D020 in mixed culture**, Related to Fig 2.

CFUs of Ngo clinical isolates D006 and D0020 and lab strain MS11 cultured alone ( $\sim 5 \times 10^7$  CFUs total CFUs) or in the presence of Nel ( $\sim 5 \times 10^7$  total CFUs each strain). Time of first plating: 6 h post-inoculation. Level of detection: 10 CFUs.

### **Fig S2. CFU/mL of vaginal swab suspension in mice colonized by Ngo and Nel**, Related to Fig 3.

Average number of (A) Ngo or (B) Nel CFUs recovered from 1 ml vaginal swab suspensions from mice inoculated vaginally with  $10^6$  CFU of Nel or Ngo alone or a mixture containing  $10^6$  CFU of each species. ( $n = 8-9$  mice/group).  $P=0.0013$  for the difference in recovery of Ngo from mice inoculated with Ngo alone or Ngo+Nel (repeated measures ANOVA). The number of (C, E) Nel or (D, F) Ngo CFU isolated from vaginal swab suspensions of individual mice inoculated with (C) Nel alone, (D) Ngo alone or (E, F) Ngo + Nel. Dotted line indicates level of detection.

### **Fig S3. CFU/ml from mice inoculated with WT or ComP-deficient Ngo, or either Ngo strain plus Nel**, Related to Fig 6.

(A-D) Average number of Nel or Ngo CFUs recovered from 1 ml vaginal swab suspensions from mice inoculated vaginally with  $10^6$  CFU of Nel, WT Ngo or the Ngo $\Delta comP$  mutant alone or a mixture containing  $10^6$  CFU of Nel and either Ngo strain. ( $n = 8-9$  mice/group).  $P=0.007$  for the difference in recovery of WT Ngo from mice inoculated with WT Ngo alone or WT Ngo+Nel (repeated measures ANOVA). The number of (E,H) Nel, (F,I) WT Ngo, or (G,J) Ngo $\Delta comP$  CFU isolated from individual mice inoculated with (E) Nel alone, (F) WT Ngo alone, (G) Ngo  $\Delta comP$  alone, (H,I) WT Ngo + Nel or (J) Ngo $\Delta comP$  + Nel. Dotted line indicates level of detection.

### **Fig S4. Restriction digests of Nel DNA confirm methylation of GpC and CpG sequences**, Related to Fig 7.

Purified Nel DNA was incubated with buffer or M.CviPI and/or M.SssI methyltransferases, and subsequently digested with HaeIII or BstUI, restriction enzymes which cleave only unmethylated GGCC and CGCG sequence, respectively.

**Fig S5. *iga* DNA from *E. coli* but not Ngo i35A is fragmented by Ngo restriction enzymes**, Related to Fig 7.

ADIDA DNA fragment derived from Ngo i35A (left) and *E. coli* K-12 (right) digested with HaeII or NlaIV (isoschizomers of NgoI and NgoV) and separated in a 0.7% agarose gel. (-) indicates incubation with buffer alone.

**Fig S6. Nel is not killed by Nel or Ngo DNA**, Related to Fig 7.

Nel and Ngo CFUs recovered after a 4 h incubation with chromosomal DNA purified from Nel and Ngo (5 µg/mL). Starting CFUs:  $5 \times 10^5$ . n=3. Error bars represent SEM. LOD: 10 CFUs. (\*\* $P < 0.01$ ; Student's t-test).

## Supplemental Tables

**Table S1. Bacterial strains and primers used in this study, Related to STAR Methods.**

**Table S2. Identification of DNA as the toxic compound in *N. elongata* supernatant, Related to Fig 4.**

**Table S3. Resistance of *N. gonorrhoeae* DNA uptake mutants to killing by *N. elongata* DNA, Related to Fig 5.**

**Table S4. Toxicity of DNA from BACs and BAC subclones for *N. gonorrhoeae*, Related to Fig 7.**

**Table S5. Modifications in Nel 29315 (this study), Ngo FA1090 (Blow *et al.*, 2016, Srikhanta *et al.* 2009), Ngo MS11 (Stein *et al.*, 1992) and *E. coli* K-12 (Marinus and Løbner-Olesen, 2014) DNA, Related to Fig 7.**

**Table S6. Toxic DNAs in this study contain sequences recognized by Ngo MS11 R/M systems, Related to Fig 4 and Fig 7.**

**Table S7. Short regions of homology (9-20 bp) between *E. coli* plasmids and Ngo MS11 chromosome contain recognition sequences from Ngo MS11 restriction modification (R/M) systems, Related to Fig 7.**

**Table S8. Orthologs of *N*-acetylmuramyl-L-alanine-amidase AmiC and lytic transglycosylase LtgA in commensal *Neisseria*, Related to Fig 2 and Fig 3.**

Fig S1. Nel kills Ngo clinical isolates D006 and D020 in mixed culture.

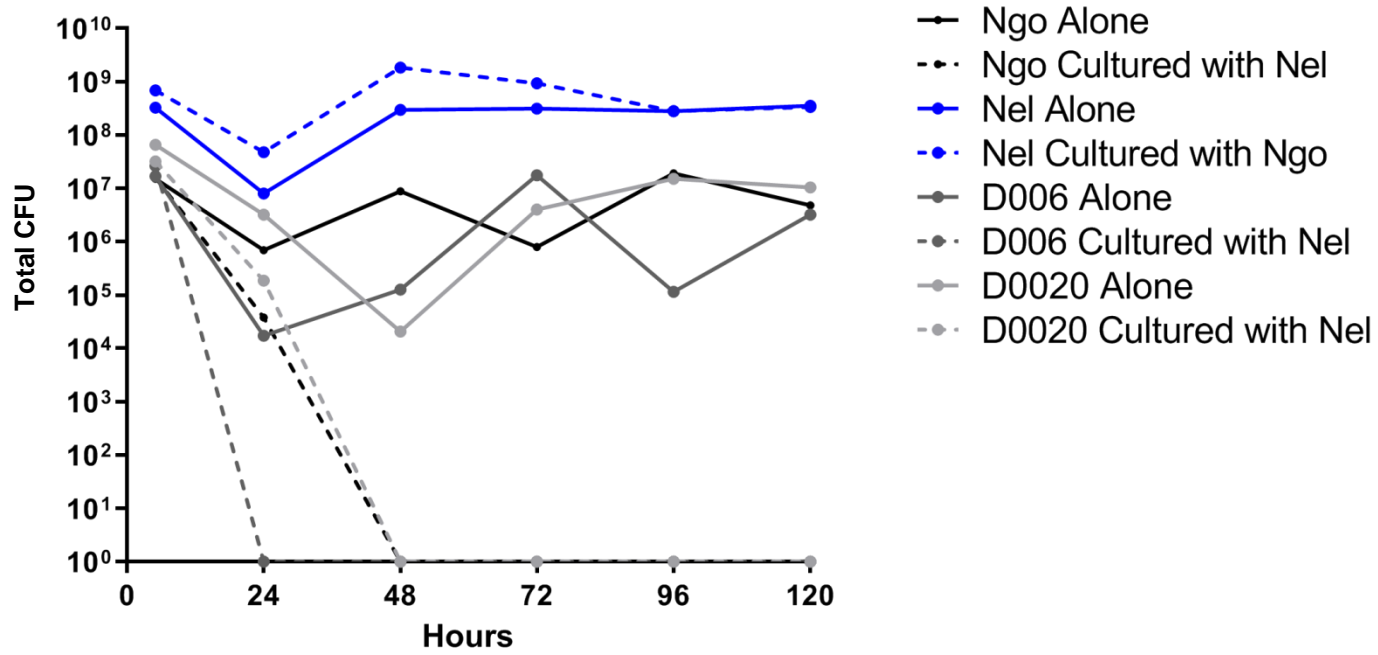

**Fig S2. CFU/mL of vaginal swab suspension in mice colonized by Ngo and Nel.**

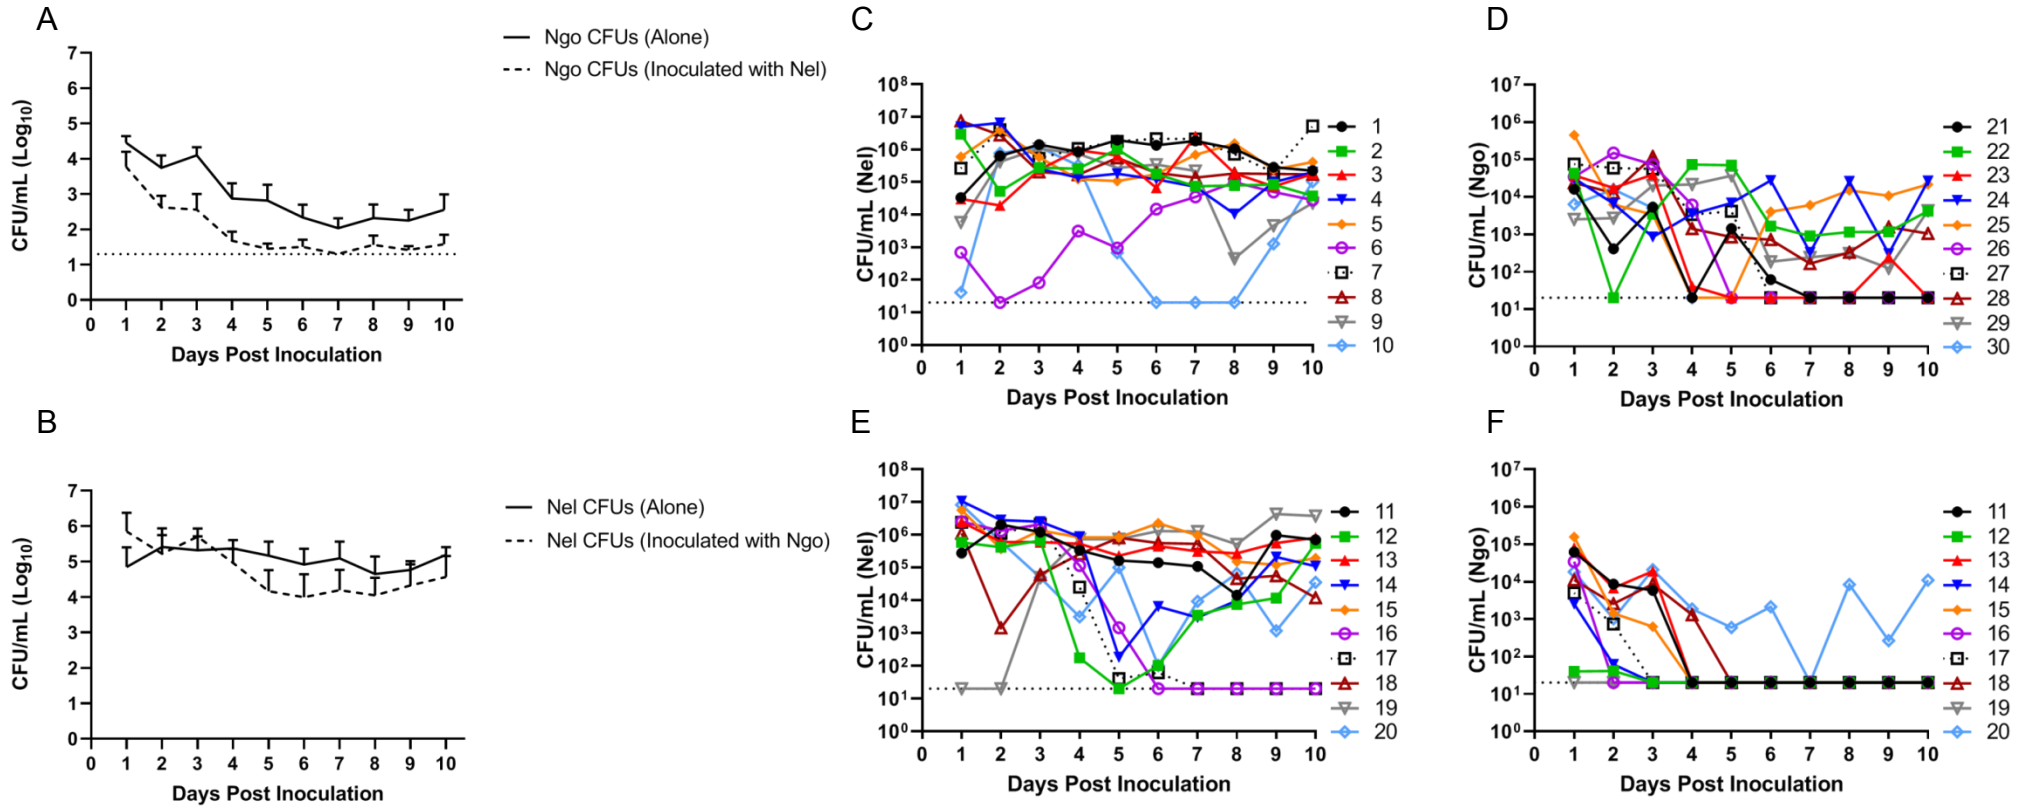

**Fig S3. CFU/ml from mice inoculated with WT or ComP-deficient Ngo, or either Ngo strain plus Nel.**

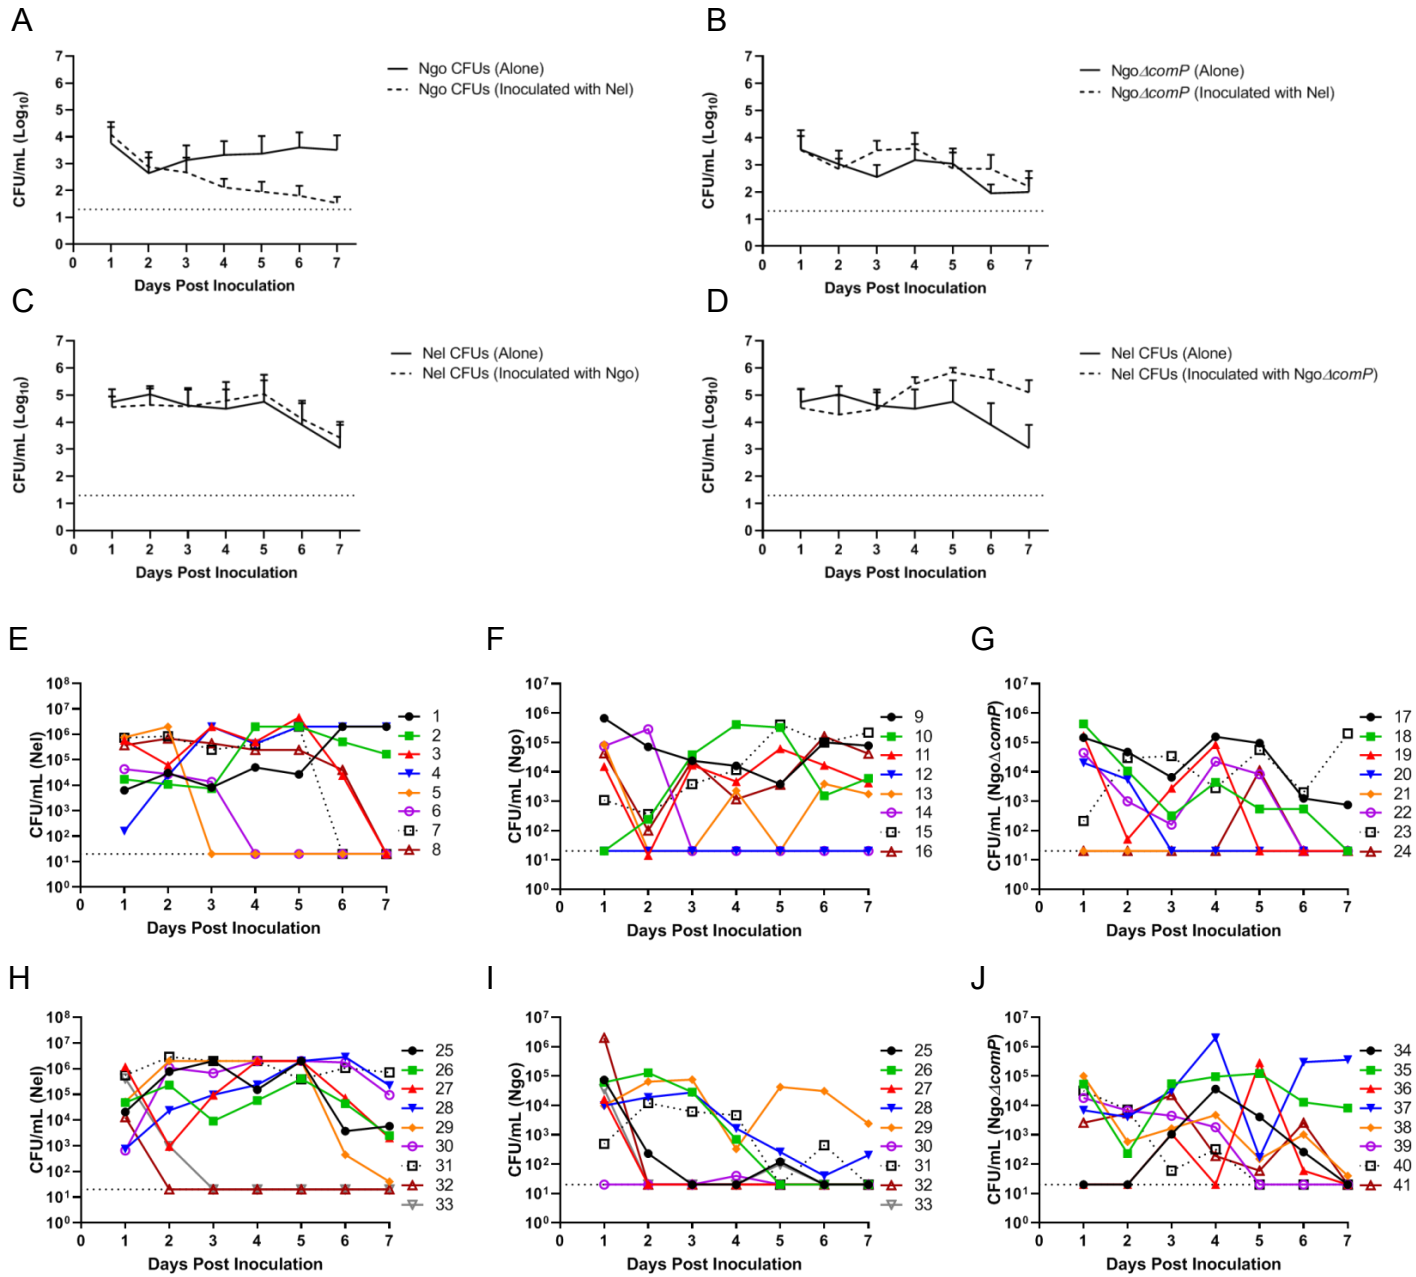

**Fig S4. Restriction digests of Nel DNA confirm methylation of GpC and CpG sequences.**

|                    |   |        |       |                   |                   |                   |                  |                  |                  |      |        |       |
|--------------------|---|--------|-------|-------------------|-------------------|-------------------|------------------|------------------|------------------|------|--------|-------|
| Motifs methylated  | - | -      | -     | Gp <sup>m</sup> C | Gp <sup>m</sup> C | Gp <sup>m</sup> C | <sup>m</sup> CpG | <sup>m</sup> CpG | <sup>m</sup> CpG | Both | Both   | Both  |
| Restriction enzyme | - | HaeIII | BstUI | -                 | HaeIII            | BstUI             | -                | HaeIII           | BstUI            | -    | HaeIII | BstUI |

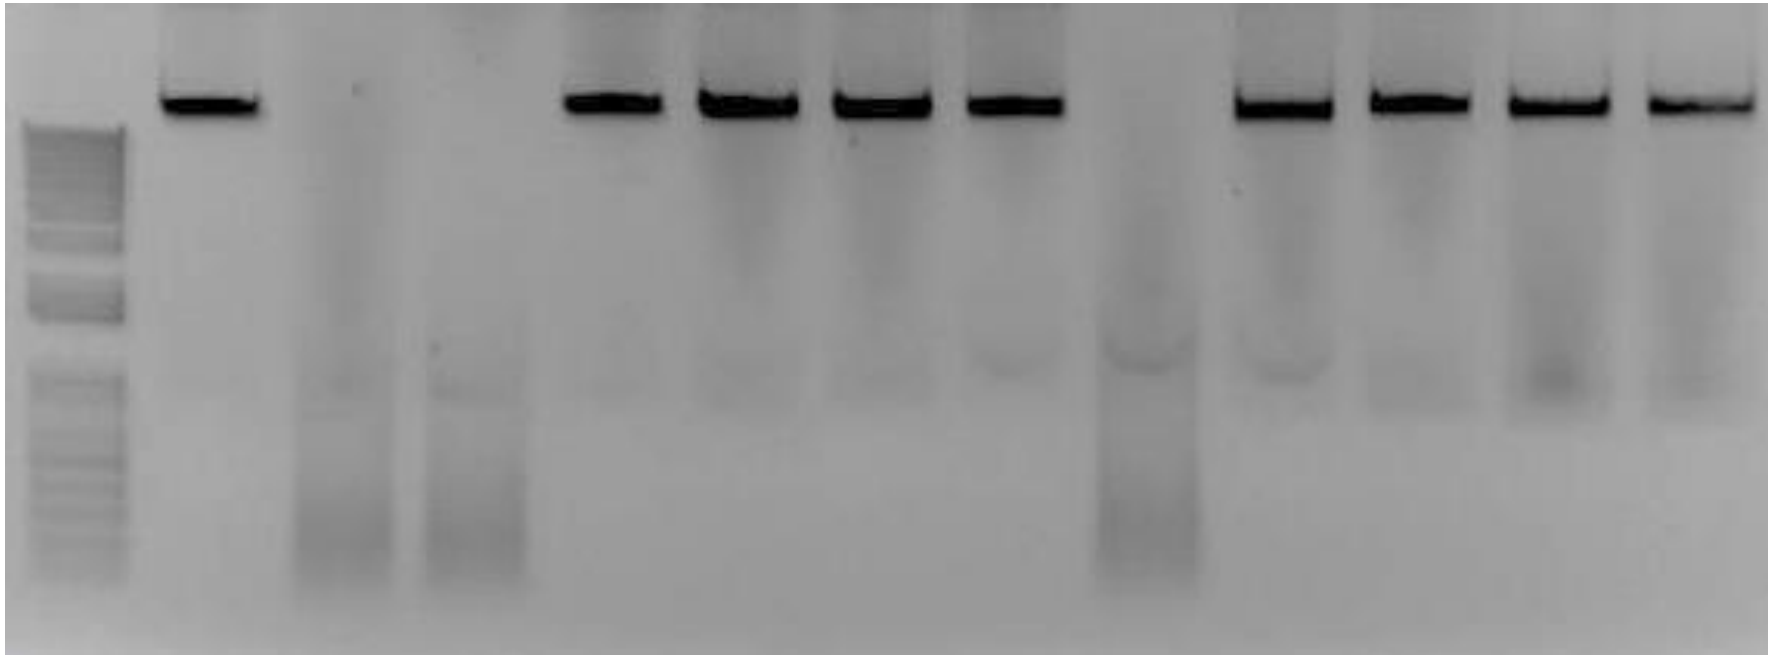

HaeIII recognition sequence: GGCC

BstUI recognition sequence: CGCG

Fig S5. *iga* DNA from *E. coli* but not from Ngo i35A is fragmented by Ngo restriction enzymes.

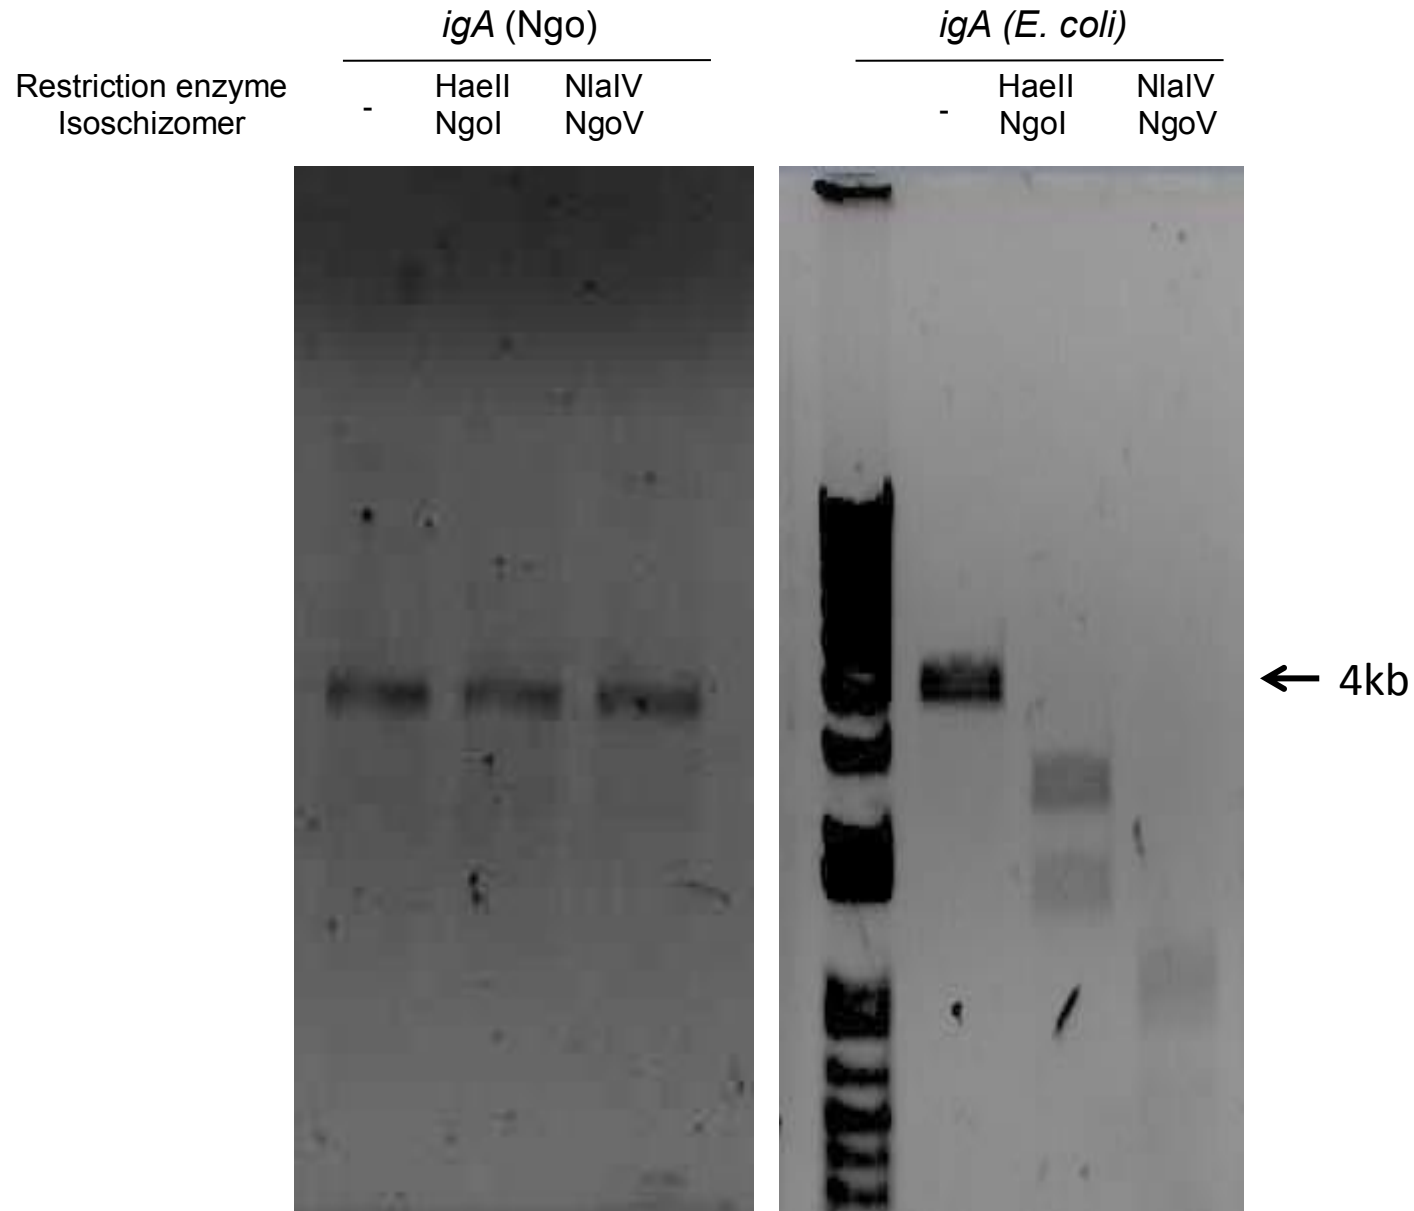



Fig S6. Nel is not killed by Nel or Ngo DNA.

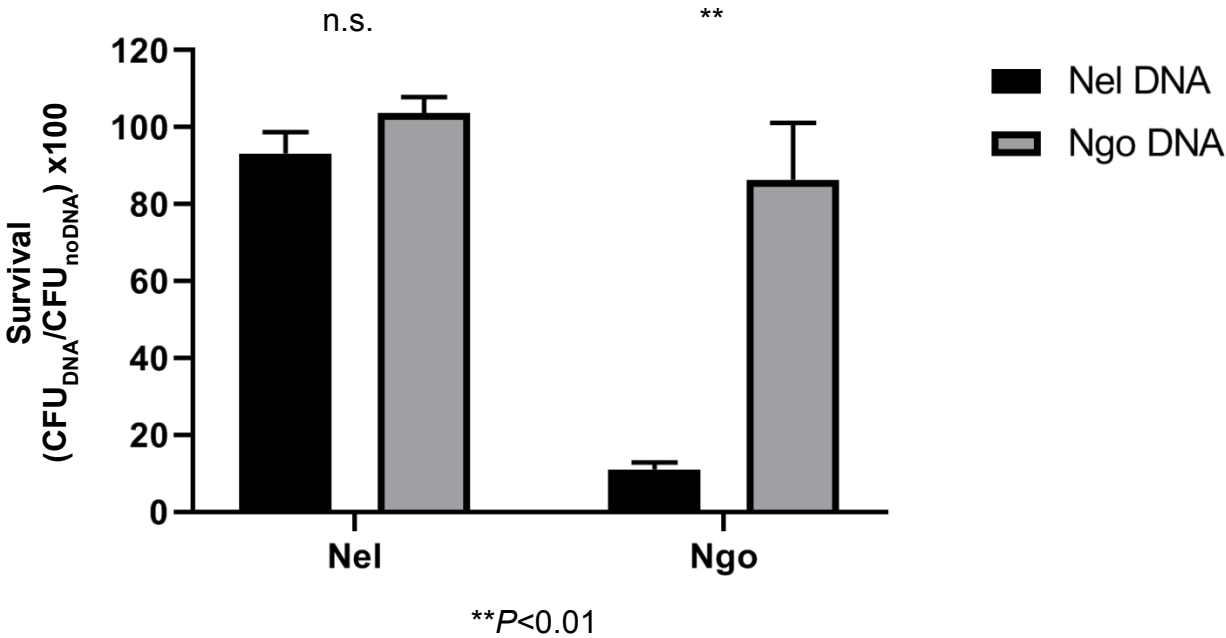

**Table S1. Bacterial strains and primers used in this study.**

| Organism (strain)              | Genotype                                                                                                                                                                                           | Source                                                              |
|--------------------------------|----------------------------------------------------------------------------------------------------------------------------------------------------------------------------------------------------|---------------------------------------------------------------------|
| <i>E. coli</i> (DH5 $\alpha$ ) | <i>dam</i> <sup>+</sup> , <i>dcm</i> <sup>+</sup>                                                                                                                                                  | Lab collection                                                      |
| <i>N. gonorrhoeae</i> (MS11)   | WT, P+, Opa-nonexpressing                                                                                                                                                                          | (Segal <i>et al.</i> , 1985)                                        |
| $\Delta pilT$                  | $\Delta pilT$                                                                                                                                                                                      | (Dietrich <i>et al.</i> , 2009)                                     |
| $\Delta pilT/ipilT$            | $\Delta pilT$ containing IPTG-inducible <i>pilT</i> <sub>WT</sub> inserted between <i>aspC</i> and <i>lctP</i>                                                                                     | This study                                                          |
| $\Delta comP$                  | $\Delta comP$                                                                                                                                                                                      | This study                                                          |
| $\Delta comP/comP_{WT}$        | <i>comP</i> <sub>WT</sub> inserted between <i>iga</i> and <i>trpB</i>                                                                                                                              | This study                                                          |
| TD3                            | $\Delta ngoll$ , $\Delta ngoIV$ , $\Delta ngoV$ R/M loci deleted                                                                                                                                   | This study                                                          |
| N400                           | IPTG-inducible <i>recA</i>                                                                                                                                                                         | (Tonjum <i>et al.</i> , 1995)                                       |
| i35A                           | AsiSI-DUS- <i>iga</i> -DUS-AsiSI (ADIDA)                                                                                                                                                           | This study                                                          |
| <i>N. elongata</i>             | ATCC 29315                                                                                                                                                                                         | (Marri <i>et al.</i> , 2010)                                        |
| <i>N. lactamica</i>            | ATCC 23970                                                                                                                                                                                         | (Marri <i>et al.</i> , 2010)                                        |
| <i>N. cinerea</i>              | ATCC 14685                                                                                                                                                                                         | (Marri <i>et al.</i> , 2010)                                        |
| <i>N. mucosa</i>               | ATCC 25996                                                                                                                                                                                         | (Marri <i>et al.</i> , 2010)                                        |
| <i>N. sicca</i>                | ATCC 29256                                                                                                                                                                                         | (Marri <i>et al.</i> , 2010)                                        |
| <i>N. polysaccharea</i>        | ATCC 32768                                                                                                                                                                                         | (Marri <i>et al.</i> , 2010)                                        |
| <i>N. meningitidis</i>         | 8013                                                                                                                                                                                               | (Nassif <i>et al.</i> , 1993)                                       |
| Primer                         | Sequence (5'-3')                                                                                                                                                                                   | Use                                                                 |
| comP_MS11_F                    | CGCCCGCACCAAAGGCCCGCCAAACCGGTGCTGCCTGCGGTTAAAA<br>AATAGAGTGGGAAATATGCATACTGCTGAATGGGATAGTAAAGTCTGTTCA<br>AAGAAATATGTTGAATAATCTGTTCTTATTGGAAGTAAAGTAATGACTGAT<br>AATCGGGGGTTTCTCGAGGGCTTGACACTTTATG | Deletion of <i>comP</i>                                             |
| comP_MS11_R                    | GATACGGATCACGGGTCATAACTATAGGCTTAATATTACACGATTCTCAT<br>TCCATCAAGGCGGAAAACCGCACAAATACTGAAACACTATCGATCGATTT<br>GTAAACAAGCCTACTTAAGTAACTTGACATCGATGTTTTAACTTCAG<br>ACGGC                               | Deletion of <i>comP</i>                                             |
| MR392                          | CCGTCCATTTCCGGTATTCAC                                                                                                                                                                              | Confirmation of <i>comP</i> deletion                                |
| MR395                          | TTTTCGATTTCTTCGCTGTG                                                                                                                                                                               | Confirmation of <i>comP</i> deletion                                |
| MR396                          | GTAAACATCAATGCGGCTTC                                                                                                                                                                               | Confirmation of <i>comP</i> insertion                               |
| 165F                           | CTCGAAGCCTTTGACTTGCT                                                                                                                                                                               | Confirmation of <i>comP</i> insertion                               |
| Ngoll_FC_F                     | CAAATGCGCCAAATCAAC                                                                                                                                                                                 | Deletion of <i>ngoll</i> ;<br>confirmation of <i>ngoll</i> deletion |
| Ngoll_FC_R                     | GGGTTTCAGTCCCAAGTTTGA                                                                                                                                                                              | Delete <i>ngoll</i> ;<br>confirmation of <i>ngoll</i> deletion      |
| NgolV_FC_F                     | GAAATCGCCGAACACGTTAT                                                                                                                                                                               | Deletion of <i>ngolV</i> ;                                          |

|                     |                                                                                                                                                                                                                                                                                                                                                                                                                                                                                                                                                                                                                                                                                                                    |                                                                                              |
|---------------------|--------------------------------------------------------------------------------------------------------------------------------------------------------------------------------------------------------------------------------------------------------------------------------------------------------------------------------------------------------------------------------------------------------------------------------------------------------------------------------------------------------------------------------------------------------------------------------------------------------------------------------------------------------------------------------------------------------------------|----------------------------------------------------------------------------------------------|
|                     |                                                                                                                                                                                                                                                                                                                                                                                                                                                                                                                                                                                                                                                                                                                    | confirmation of <i>ngoIV</i> deletion                                                        |
| NgoIV_FC_R          | CCAATACGCCGACATAATCC                                                                                                                                                                                                                                                                                                                                                                                                                                                                                                                                                                                                                                                                                               | Deletion of <i>ngoIV</i> ;<br>confirmation of <i>ngoIV</i> deletion                          |
| NgoV_FC_F           | TCGCGCACAATCAAATATC                                                                                                                                                                                                                                                                                                                                                                                                                                                                                                                                                                                                                                                                                                | Deletion of <i>ngoV</i> ;<br>confirmation of <i>ngoV</i> deletion                            |
| NgoV_FC_R           | ACGCGTAAAACTTCGGTTG                                                                                                                                                                                                                                                                                                                                                                                                                                                                                                                                                                                                                                                                                                | Delete <i>ngoV</i> ;<br>confirmation of <i>ngoV</i> deletion                                 |
| DUS_pCR-<br>Blunt_F | ATGCCGTCTGAAGTACGGCA<br>GTTTAAGGTTTACACC                                                                                                                                                                                                                                                                                                                                                                                                                                                                                                                                                                                                                                                                           | Addition of DUS to pCR-Blunt;<br>PCR amplification of pCR-<br>Blunt                          |
| pCR-Blunt_R         | GTATAGGCTGCGCAACTGTT                                                                                                                                                                                                                                                                                                                                                                                                                                                                                                                                                                                                                                                                                               | PCR amplification of pCR-<br>Blunt                                                           |
| M13_F               | TGTAAAACGACGGCCAGT                                                                                                                                                                                                                                                                                                                                                                                                                                                                                                                                                                                                                                                                                                 | Sequencing of pCR-Blunt and<br>BAC clones/ subclones                                         |
| M13_R               | CAGGAAACAGCTATGAC                                                                                                                                                                                                                                                                                                                                                                                                                                                                                                                                                                                                                                                                                                  | Sequencing of pCR-Blunt and<br>BAC clones/ subclones                                         |
| Iga5_F              | GCAGCTATCTGATGCAGGAC                                                                                                                                                                                                                                                                                                                                                                                                                                                                                                                                                                                                                                                                                               | Sequencing of i35A; PCR<br>amplification of ADIDA                                            |
| Iga5_R              | AGCTTGAGAAGCCGGTTACA                                                                                                                                                                                                                                                                                                                                                                                                                                                                                                                                                                                                                                                                                               | Sequencing of i35A                                                                           |
| Iga3_F              | TTCCATTCTTGCCATGATTTT                                                                                                                                                                                                                                                                                                                                                                                                                                                                                                                                                                                                                                                                                              | Sequencing of i35A                                                                           |
| Iga3_R              | TTCTTGCCTATGCCCTTACG                                                                                                                                                                                                                                                                                                                                                                                                                                                                                                                                                                                                                                                                                               | Sequencing of i35A; PCR<br>amplification of ADIDA                                            |
| MR616               | ATACGTTTCCTTAATTAACAGAGCCGCATTATGCAGATTA                                                                                                                                                                                                                                                                                                                                                                                                                                                                                                                                                                                                                                                                           | <i>pilT</i> amplification to clone into<br>pKH37                                             |
| MR617               | ATACGTTTCCATCGATGGTTGTGTGTCAGAACTCATAC                                                                                                                                                                                                                                                                                                                                                                                                                                                                                                                                                                                                                                                                             | <i>pilT</i> amplification to clone into<br>pKH37                                             |
| MR618               | ATGCACTTCTTCGCAGGTTT                                                                                                                                                                                                                                                                                                                                                                                                                                                                                                                                                                                                                                                                                               | Confirmation of <i>pilT</i> insertion<br>between <i>aspC</i> and <i>lctP</i>                 |
| Iga5AD              | CGGTTTGGGCGTGGATACGCCTGACCACGCCGCGCCGATTACTTCGGG<br>CGCACCGATTGGCGTACTGCACGGCTTCCGCAGCTATCTGATGCAGGA<br>CGAAAACGGCCAAGTCTTGGGGACGCACTCTGTTTCCGCAGGCTTGGA<br>TTACCCCGGCATCGGCCCGGAACACAGCCATCTGCACGACATCAAGCG<br>CGTCGAATACACCGTTGCCAAAGATGACGAAGCACTCGAAGCCTTTGAC<br>TTGCTCTGCCGATTTCGAGGGCATCATCCCCGCGCTCGAATCCAGCCAC<br>GCCGTTGCTTGGGCGGTGAAAAACGCGCCGAAAATGGGTAAAGACCAA<br>GTGATTTTGGTCAACCTGTCGGGTCGCGGCGACAAAGACATCAATACCG<br>TGGCGAAACTCAAAGGCATTGAGCTGTAGCTTTGTTAGTCTGATAAAAAT<br>GCCGTCCGAAGCTTGAGTTCAGACGGCATTATTTTGTCTATGAATTTGG<br>TATT <b>GCGATCGCATGCCGTCTGA</b> ATTAGAAACGAATCTGTATTTTAATTT<br>GTCCGGATTTTTGTTTTCCAATTGTTTTCTTTTGTAAACTGCCATTTA<br>CGTTTAATGTAACATTACGGTACAGTAACGCGGCGCCTGCTGAATATTG | Introduction of <b>AsiSI</b><br>restriction site and <u>DUS12</u> to<br>5' end of <i>iga</i> |

|        |                                                                                                                                                                                                                                                                                                                                                                                                                                                                                                                                                                                                                                                                                                                                                                                                                                                                                                                                                                                                                                                                                                                                                                       |                                                                                               |
|--------|-----------------------------------------------------------------------------------------------------------------------------------------------------------------------------------------------------------------------------------------------------------------------------------------------------------------------------------------------------------------------------------------------------------------------------------------------------------------------------------------------------------------------------------------------------------------------------------------------------------------------------------------------------------------------------------------------------------------------------------------------------------------------------------------------------------------------------------------------------------------------------------------------------------------------------------------------------------------------------------------------------------------------------------------------------------------------------------------------------------------------------------------------------------------------|-----------------------------------------------------------------------------------------------|
|        | <p>CTGTTGATTATCTGCTTTATAGGCGAAGGATTTACCGCCACATTACGC<br/> CGCCTTTGCCATAATTGGCAAAGTAAGCTGCAGATAACAAGGGTTTTAC<br/> GGTAAGGTTGCCGACTTTAAACCGATAAGCAAAATCCAGTCCGGCCGTT<br/> AGTGTTTTCACTGCCATAGAACTTACTTTAACACTGTCGTCACCCAACTT<br/> GTAATCTGCAGATGACAGGCGGCTGTAACGGATACCCGCACTAGGGAC<br/> AATCTCGAATTGATTGATTTTTCAGCGTATTGCCCAAAGTAAGGCCGGTTT<br/> GGATGCTTGTTGCGTTAAAGTTTGCTTTTTGCTGCGTTTGTAAACCGCTT<br/> CTCAAGCTGCCCGCACCA</p>                                                                                                                                                                                                                                                                                                                                                                                                                                                                                                                                                                                                                                                                                                                                          |                                                                                               |
| DAIga3 | <p>TCGTGTTGTTTGATTTTATCTGCAAATTCTTTTTTATAGATATTCCATTCTT<br/> GCCATGATTTTTTTCCGTAACCTGCCCAATAATCGTAAGTTCCCAAAAAG<br/> ACCCATTGATTTTTTTGTTTGTCAAAGCAAATAGTGGAGAGCCGCTATC<br/> GCCCAACACGCCGTAATTTGTTAACGCATCTTGCGAAAGTGCTTGTTTAA<br/> GTTCTTCTGCCGAATACTGTTTATTATGATTACCAAAGCCGATCAAACCT<br/> TCGGTATTCATTGTTTGGTCAATATTAATATCTTTATAAGGCGTACCTGCA<br/> ATGGCATAACGATAGGCTTGTGAAAGATCGCGCAAATCGTAGCCTTTTT<br/> CATTTCTTCTTGATGATAAACCCCTTTTTTCATAAACTAATTGCCTGCCCG<br/> CACCGATTCTGACAAAAGAGGAAAAACGGTTTTTATCTTTGTAGGTATCC<br/> AATCCGCCGCCGGCATCAGTTGGTGAATCGGTGCCAATGCCGTCTGA<br/> <u>AGCGATCGC</u>CTTCGGTTACAACTTATTTAAAACGCGCCATATTATAATCT<br/> TCGAGGCGGCCTAAATTGCTCGCACCCCAAGCTTTATGGGGTTCATAGT<br/> TATTTTGTTCGACAACGCGGTATTCATTTCTTTGTCGGCTACATCATTAT<br/> GACCGTTGTATTGGCCGTAATAAAAAGTATGGACTTCTGCTTTGGCGTGT<br/> TTGACGCTGACGGCATATTGGGGATCGACTACCGTTGCTATGCGTTTTGT<br/> TGACATCTGCAACGCTAAAATCAATCATCGGTACGTTGGATAATGCGTTG<br/> CCGATGTTTTGACCTCGTTTGTTTTTCACTGATAAATCGGTTGCGCCGAC<br/> AAAAAATTTGCCTTTGTTTTCTGCAAAGTCACGGAATATTTGATAATCGAC<br/> ATCGTCTCTACCAATGCCGCTTCTGAGTATGGCGTAAGGGCATAGGCA<br/> AGAAAGATGGATAAGGATATGGCGTTAATTTTAAAACGTTTGGCTTTCAT</p> | <p>Introduction of <u>DUS12</u> and <b>AsiSI</b> restriction site to 3' end of <i>iga</i></p> |

**Table S2. Identification of DNA as the toxic compound in *N. elongata* supernatant.**

| <b>Supernatant treatment</b> | <b>Clearance zone</b> |
|------------------------------|-----------------------|
| DNase I                      | No                    |
| DNase I, boiled              | Yes                   |
| Proteinase K                 | Yes                   |
| Proteinase K, boiled         | Yes                   |
| RNase I                      | Yes                   |

**Table S3. Resistance of *N. gonorrhoeae* DNA uptake mutants to killing by *N. elongata* DNA.**

| Strain                  | Clearance zone |
|-------------------------|----------------|
| MS11 WT                 | Yes            |
| $\Delta pilE$           | No             |
| $\Delta comP$           | No             |
| $\Delta comP/comP_{WT}$ | Yes            |

**Table S4. Toxicity of DNA from BACs and BAC subclones for *N. gonorrhoeae*.**

| <b>BAC clones</b>         | <b>Insert start position</b> | <b>Insert end position</b> | <b>Insert length (bp)</b> | <b>Clearance zone</b> |
|---------------------------|------------------------------|----------------------------|---------------------------|-----------------------|
| pBeloBAC11 vector (7.5kb) | -                            | -                          | 0                         | No                    |
| 6.1                       | 1021119                      | 1044807                    | 23688                     | Yes                   |
| 6.2                       | 2097448                      | 2126542                    | 29094                     | Yes                   |
| 6.3                       | 1193060                      | 1242918                    | 49858                     | Yes                   |
| 6.4                       | 1030576                      | 1081623                    | 51047                     | Yes                   |
| 6.5                       | 2097448                      | 2126542                    | 28358                     | Yes                   |
| <b>BAC 6.1 subclones</b>  |                              |                            |                           |                       |
| pUC19 vector (2.7 kb)     | -                            | -                          | 0                         | No                    |
| 6.1.3                     | 1024777                      | 1029727                    | 4950                      | Yes                   |
| 6.1.11                    | 1033760                      | 1038767                    | 5007                      | Yes                   |
| 6.1.13                    | 1042473                      | 1044193                    | 1720                      | Yes                   |
| 6.1.20                    | 1021144                      | 1024413                    | 3269                      | Yes                   |
| 6.1.24                    | 1039200                      | 1044555                    | 5355                      | Yes                   |
| 6.1.26                    | 1031310                      | 1038748                    | 7438                      | Yes                   |

**Table S5. Modifications in Nel 29315 (this study), Ngo FA1090 (Blow *et al.*, 2016, Srikhanta *et al.* 2009), Ngo MS11 (Stein *et al.*, 1992) and *E. coli* K-12 (Marinus and Løbner-Olesen, 2014) DNA.**

| Organism                   | R/M System          | Recognition Sequence          | Nucleotide           | Detection Method           |
|----------------------------|---------------------|-------------------------------|----------------------|----------------------------|
| <b>Nel 29315</b>           | Unknown             | GGA <sup>m</sup> AC           | Adenine              | PacBio SMRT                |
|                            |                     | CRT <sup>m</sup> ANNNNNNTGC   | Adenine              |                            |
|                            |                     | TA <sup>m</sup> ATNNNNNNRRTAY | Adenine              |                            |
| <b>Ngo FA1090</b>          | NgoI                | RG <sup>m</sup> CGCY          | Cytosine             | PacBio SMRT                |
|                            | NgoII               | GG <sup>m</sup> CC            | Cytosine             |                            |
|                            | NgoIII              | <sup>m</sup> CCGCGG           | Cytosine             |                            |
|                            | NgoIV               | G <sup>m</sup> CCGGC          | Cytosine             |                            |
|                            | NgoV                | GGNN <sup>m</sup> CC          | Cytosine             |                            |
|                            | NgoAV               | GC <sup>m</sup> ANNNNNNNNTGC  | Adenine              |                            |
|                            | NgoAXVII            | G <sup>m</sup> AGNNNNNTAC     | Adenine              |                            |
|                            | NgoAXVI             | GGTG <sup>m</sup> A           | Adenine              |                            |
|                            | NgoAX               | CC <sup>m</sup> ACC           | Adenine              |                            |
| NgoAXII                    | AGAA <sup>m</sup> A | Adenine                       | Restriction analysis |                            |
| <b>Ngo MS11</b>            | NgoI                | RG <sup>m</sup> CGCY          | Cytosine             | Restriction analysis       |
|                            | NgoII               | GG <sup>m</sup> CC            | Cytosine             |                            |
|                            | NgoIII              | <sup>m</sup> CCGCGG           | Cytosine             |                            |
|                            | NgoIV               | G <sup>m</sup> CCGGC          | Cytosine             |                            |
|                            | NgoV                | GGNN <sup>m</sup> CC          | Cytosine             |                            |
|                            | NgoVIII             | T <sup>m</sup> CACC           | Cytosine             |                            |
|                            | NgoAXVI             | GGTG <sup>m</sup> A           | Adenine              | PacBio SMRT                |
| <b><i>E. coli</i> K-12</b> | EcoKI               | A <sup>m</sup> ACNNNNNGTCG    | Adenine              | Review of previous studies |
|                            | Dam                 | G <sup>m</sup> ATC            | Adenine              |                            |
|                            | Dcm                 | C <sup>m</sup> CWGG           | Cytosine             |                            |

R: A or G; Y: C or T; N: any base.



**Table S6. Toxic DNAs in this study contain sequences recognized by Ngo MS11 R/M systems.**

| R/M system | Recognition sequence | # Occurrences |           |       |
|------------|----------------------|---------------|-----------|-------|
|            |                      | Nel DNA       | pCR-Blunt | ADIDA |
| Ngol       | RG <sup>m</sup> CGCY | 514           | 3         | 2     |
| Ngoll      | GG <sup>m</sup> CC   | 16392         | 24        | 9     |
| Ngolll     | <sup>m</sup> CCGCGG  | 420           | 0         | 0     |
| NgolV      | G <sup>m</sup> CCGGC | 1592          | 3         | 4     |
| NgoV       | GGNN <sup>m</sup> CC | 2710          | 9         | 7     |
| NgoVIII    | T <sup>m</sup> CACC  | 1582          | 3         | 2     |
| NgoAXVI    | GGTG <sup>m</sup> A  | 1656          | 3         | 2     |

**R:** A or G; **Y:** C or T; **N:** any base.

**Table S7. Short regions of homology (9-20 bp) between *E. coli* plasmids and Ngo MS11 chromosome contain recognition sequences from Ngo MS11 restriction modification (R/M) systems.**

| Plasmid    | R/M system | Recognition sequence | # of occurrences in Ngo chromosome | Homology length (minimum) | Homology length (maximum) |
|------------|------------|----------------------|------------------------------------|---------------------------|---------------------------|
| pCR-Blunt  | NgoI       | RG <sup>m</sup> CGCY | 11                                 | 10                        | 12                        |
|            | NgoII      | GG <sup>m</sup> CC   | 414                                | 10                        | 17                        |
|            | NgoIII     | <sup>m</sup> CCGCGG  | 0                                  | -                         | -                         |
|            | NgoIV      | G <sup>m</sup> CCGGC | 94                                 | 10                        | 17                        |
|            | NgoV       | GGNN <sup>m</sup> CC | 36                                 | 10                        | 15                        |
|            | NgoVIII    | T <sup>m</sup> CACC  | 14                                 | 10                        | 15                        |
|            | NgoAXVI    | GGTG <sup>m</sup> A  | 21                                 | 10                        | 13                        |
| pBeloBAC11 | NgoI       | RG <sup>m</sup> CGCY | 6                                  | 10                        | 13                        |
|            | NgoII      | GG <sup>m</sup> CC   | 205                                | 10                        | 18                        |
|            | NgoIII     | <sup>m</sup> CCGCGG  | 0                                  | -                         | -                         |
|            | NgoIV      | G <sup>m</sup> CCGGC | 104                                | 10                        | 17                        |
|            | NgoV       | GGNN <sup>m</sup> CC | 30                                 | 10                        | 17                        |
|            | NgoVIII    | T <sup>m</sup> CACC  | 51                                 | 10                        | 15                        |
|            | NgoAXVI    | GGTG <sup>m</sup> A  | 48                                 | 10                        | 16                        |
| pUC19      | NgoI       | RG <sup>m</sup> CGCY | 20                                 | 9                         | 15                        |
|            | NgoII      | GG <sup>m</sup> CC   | 178                                | 9                         | 15                        |
|            | NgoIII     | <sup>m</sup> CCGCGG  | 0                                  | -                         | -                         |
|            | NgoIV      | G <sup>m</sup> CCGGC | 1                                  | 20                        | 20                        |
|            | NgoV       | GGNN <sup>m</sup> CC | 47                                 | 9                         | 15                        |
|            | NgoVIII    | T <sup>m</sup> CACC  | 65                                 | 9                         | 15                        |
|            | NgoAXVI    | GGTG <sup>m</sup> A  | 64                                 | 9                         | 13                        |

**R:** A or G; **Y:** C or T; **N:** any base.

**Table S8. Orthologs of *N*-acetylmuramyl-L-alanine-amidase AmiC and lytic transglycosylase LtgA in commensal *Neisseria*.**

| <i>Neisseria</i> species (strain)    | AmiC         |              | LtgA         |              |
|--------------------------------------|--------------|--------------|--------------|--------------|
|                                      | Coverage (%) | Identity (%) | Coverage (%) | Identity (%) |
| <i>N. elongata</i> (ATCC 29315)      | 99           | 56           | 99           | 61           |
| <i>N. sicca</i> (ATCC 29256)         | 99           | 76           | 98           | 69           |
| <i>N. mucosa</i> (ATCC 25996)        | 99           | 76           | 99           | 68           |
| <i>N. subflava</i> (NJ9703)          | 100          | 75           | 98           | 71           |
| <i>N. flavescens</i> (NRL30031)      | 86           | 79           | 98           | 71           |
| <i>N. cinerea</i> (ATCC 14685)       | 100          | 94           | 99           | 88           |
| <i>N. polysaccharea</i> (ATCC 43768) | 100          | 95           | 100          | 96           |
| <i>N. lactamica</i> (ATCC 23970)     | 100          | 97           | 100          | 97           |

Coverage and identity values were obtained by querying AmiC and LtgA amino acid sequences against the genome database using blastp at ncbi. (<http://blast.ncbi.nlm.nih.gov/Blast.cgi>).
